# Supplementary figures and images for: The origin and evolution of a distinct mechanism of transcription initiation in yeasts
Source: HighWire-hosted journal article supplement (doi:10.1101/gr.264325.120), 2020-11-20

**control**

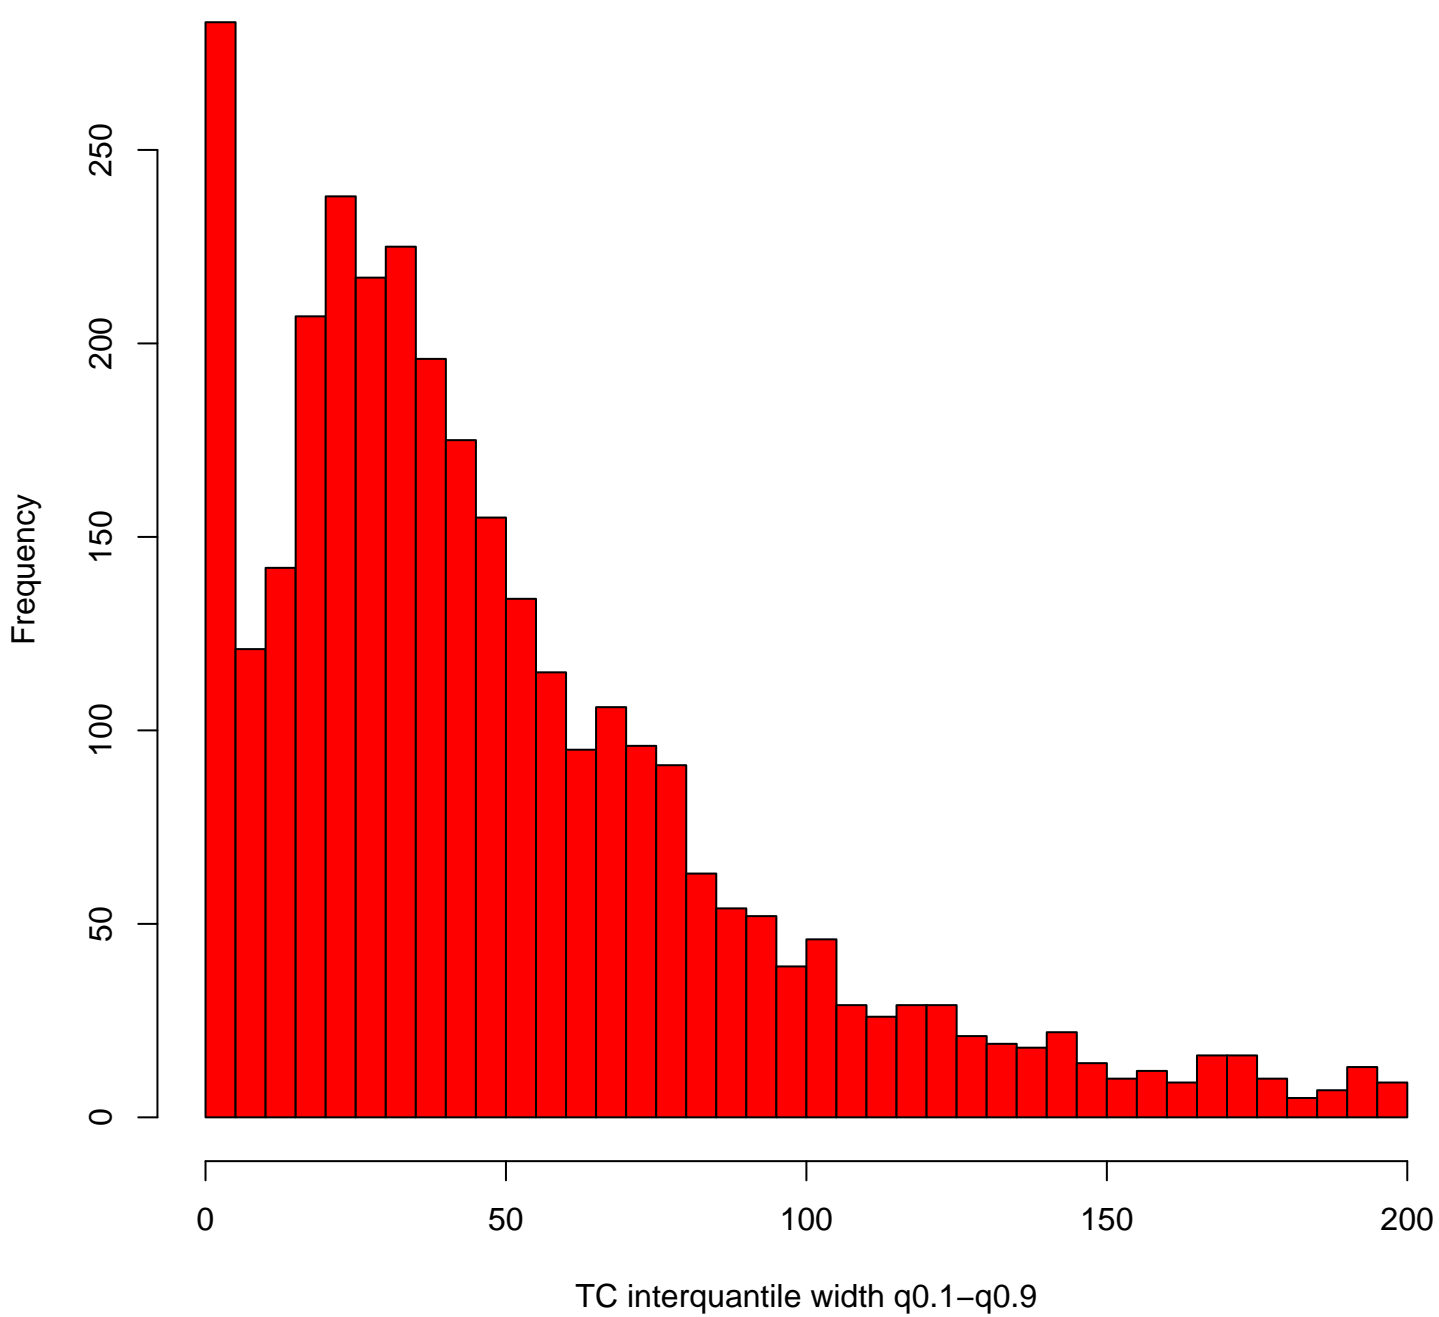

**treat**

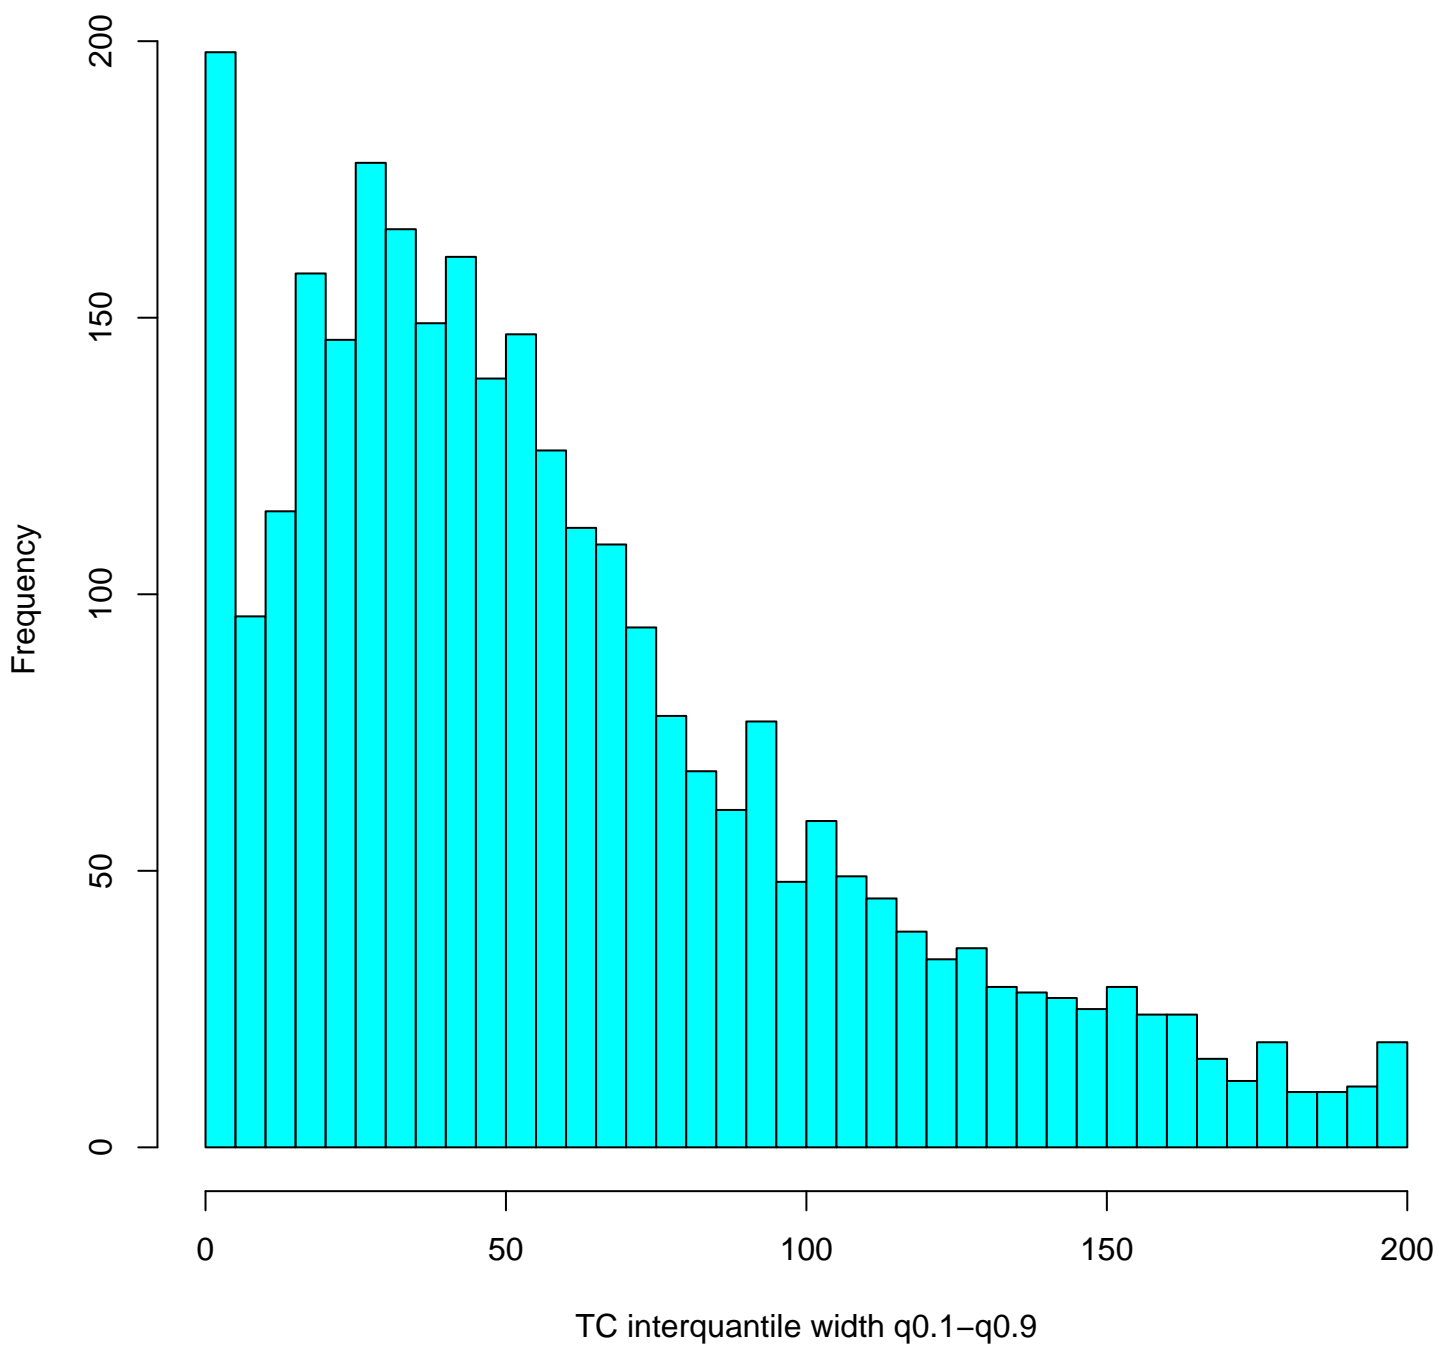

Supplement: Supplemental_Code_.zip [file Interquantile_plot_of_ALL_samples.pdf › TSSr-master/docs/reference/Interquantile_plot_of_ALL_samples.pdf]

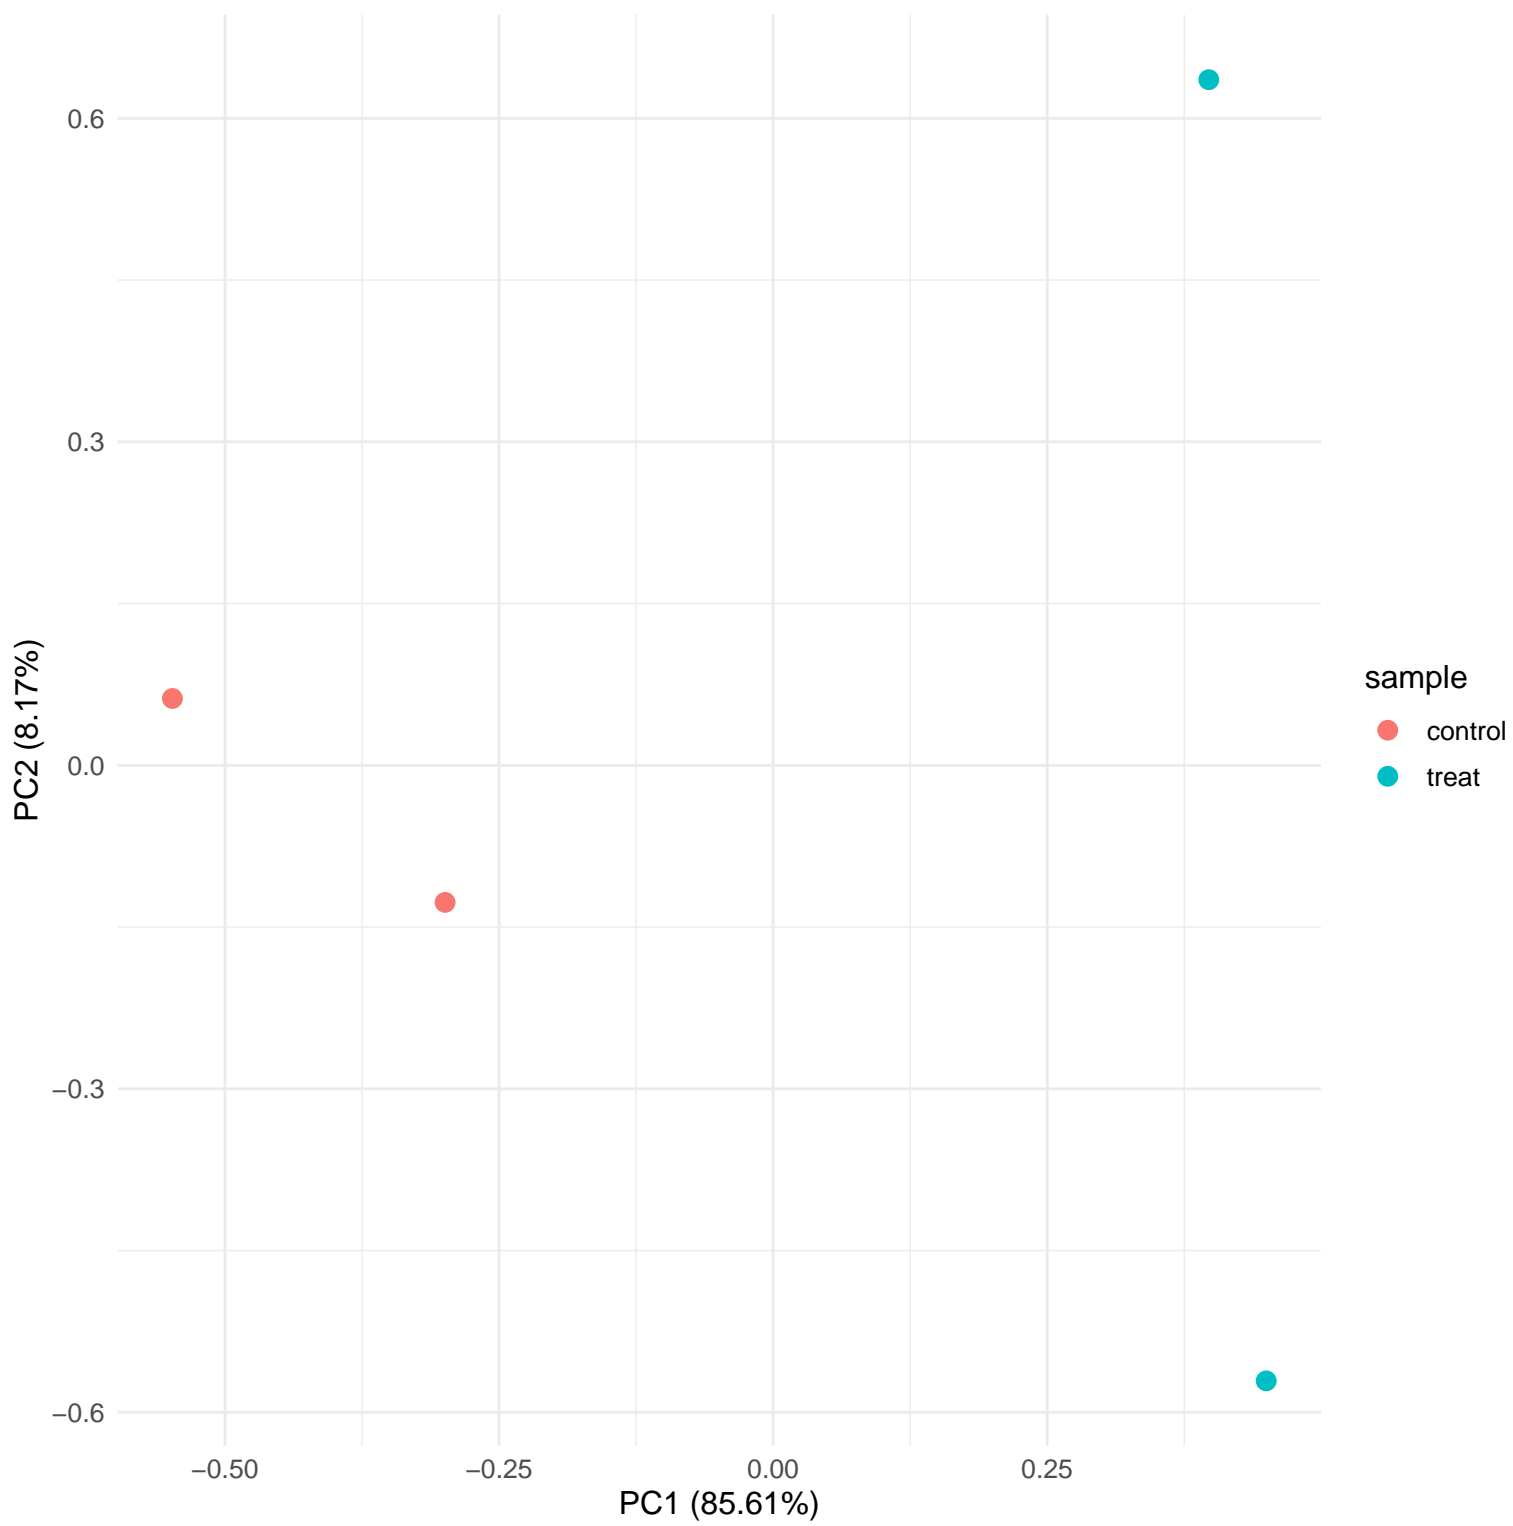

Supplement: Supplemental_Code_.zip [file PCA_plot.pdf › TSSr-master/docs/reference/PCA_plot.pdf]

**control**

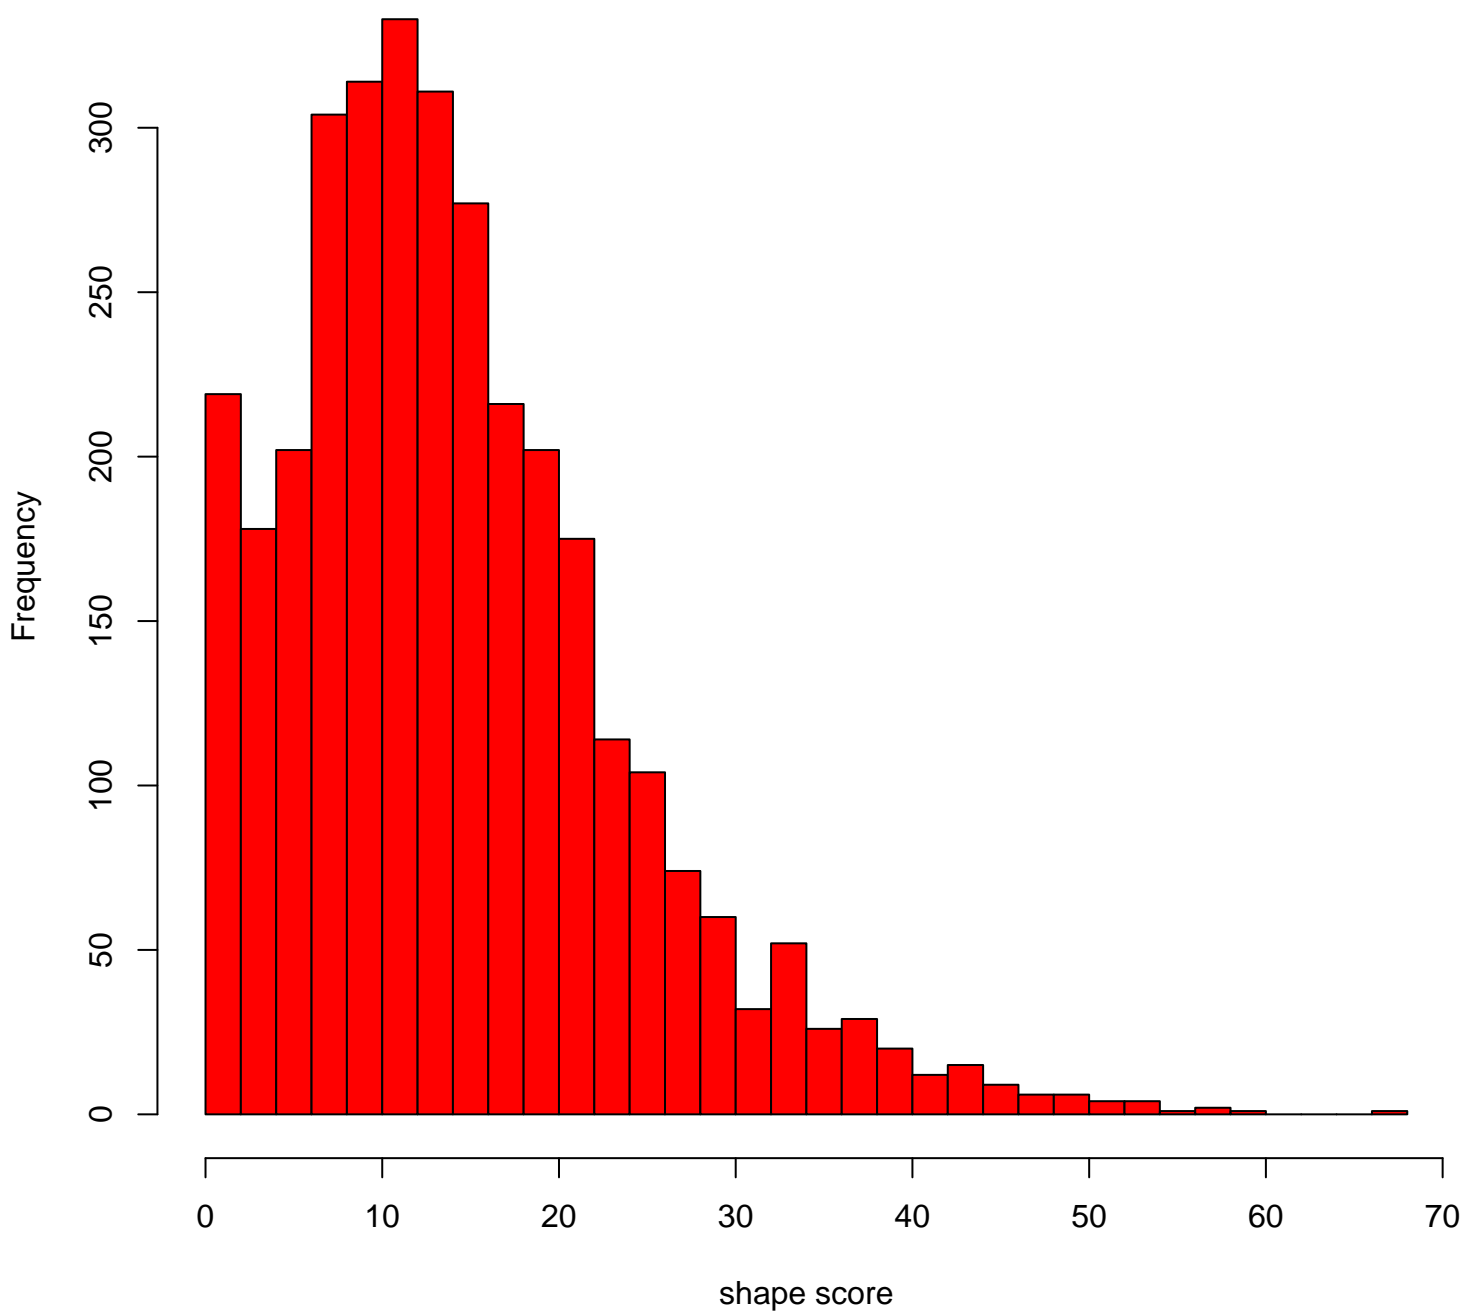

**treat**

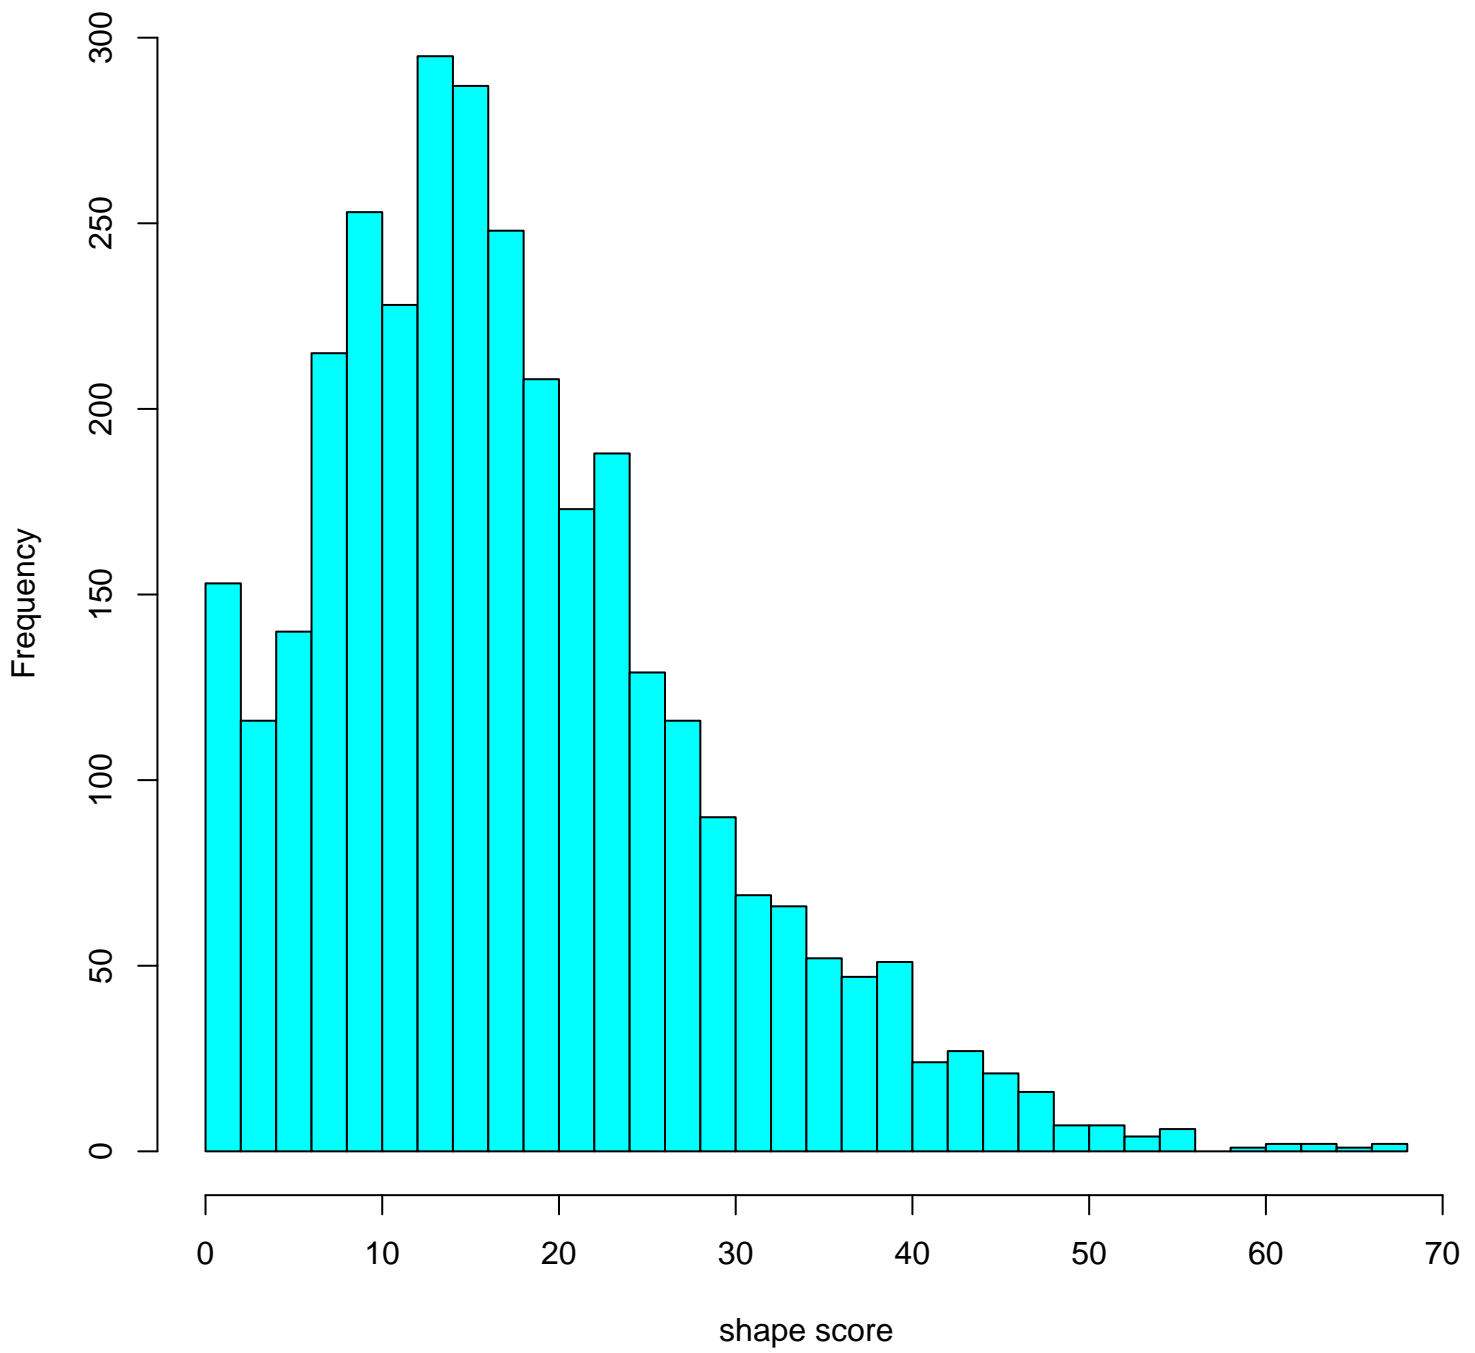

Supplement: Supplemental_Code_.zip [file Shape_plot_of_ALL_samples.pdf › TSSr-master/docs/reference/Shape_plot_of_ALL_samples.pdf]

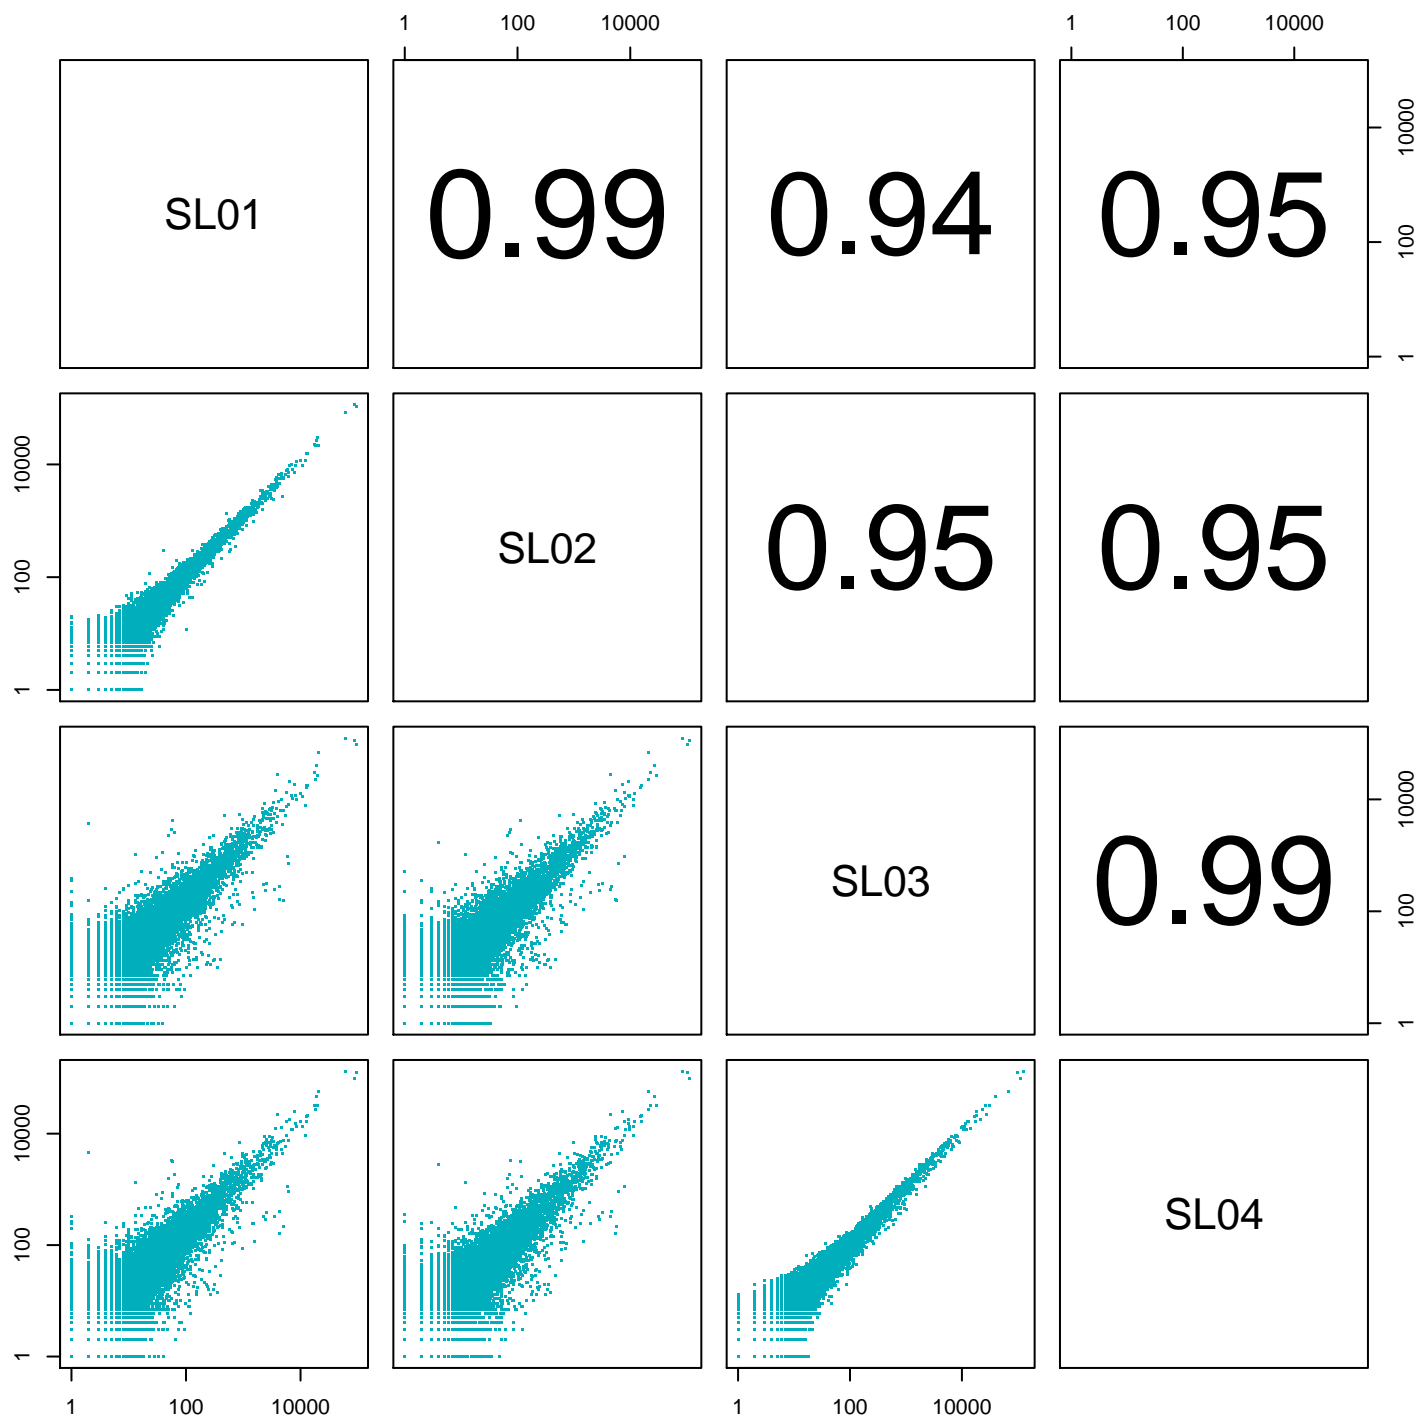

Supplement: Supplemental_Code_.zip [file TSS_correlation_plot_of_all_samples.pdf › TSSr-master/docs/reference/TSS_correlation_plot_of_all_samples.pdf]

control\_VS\_treat

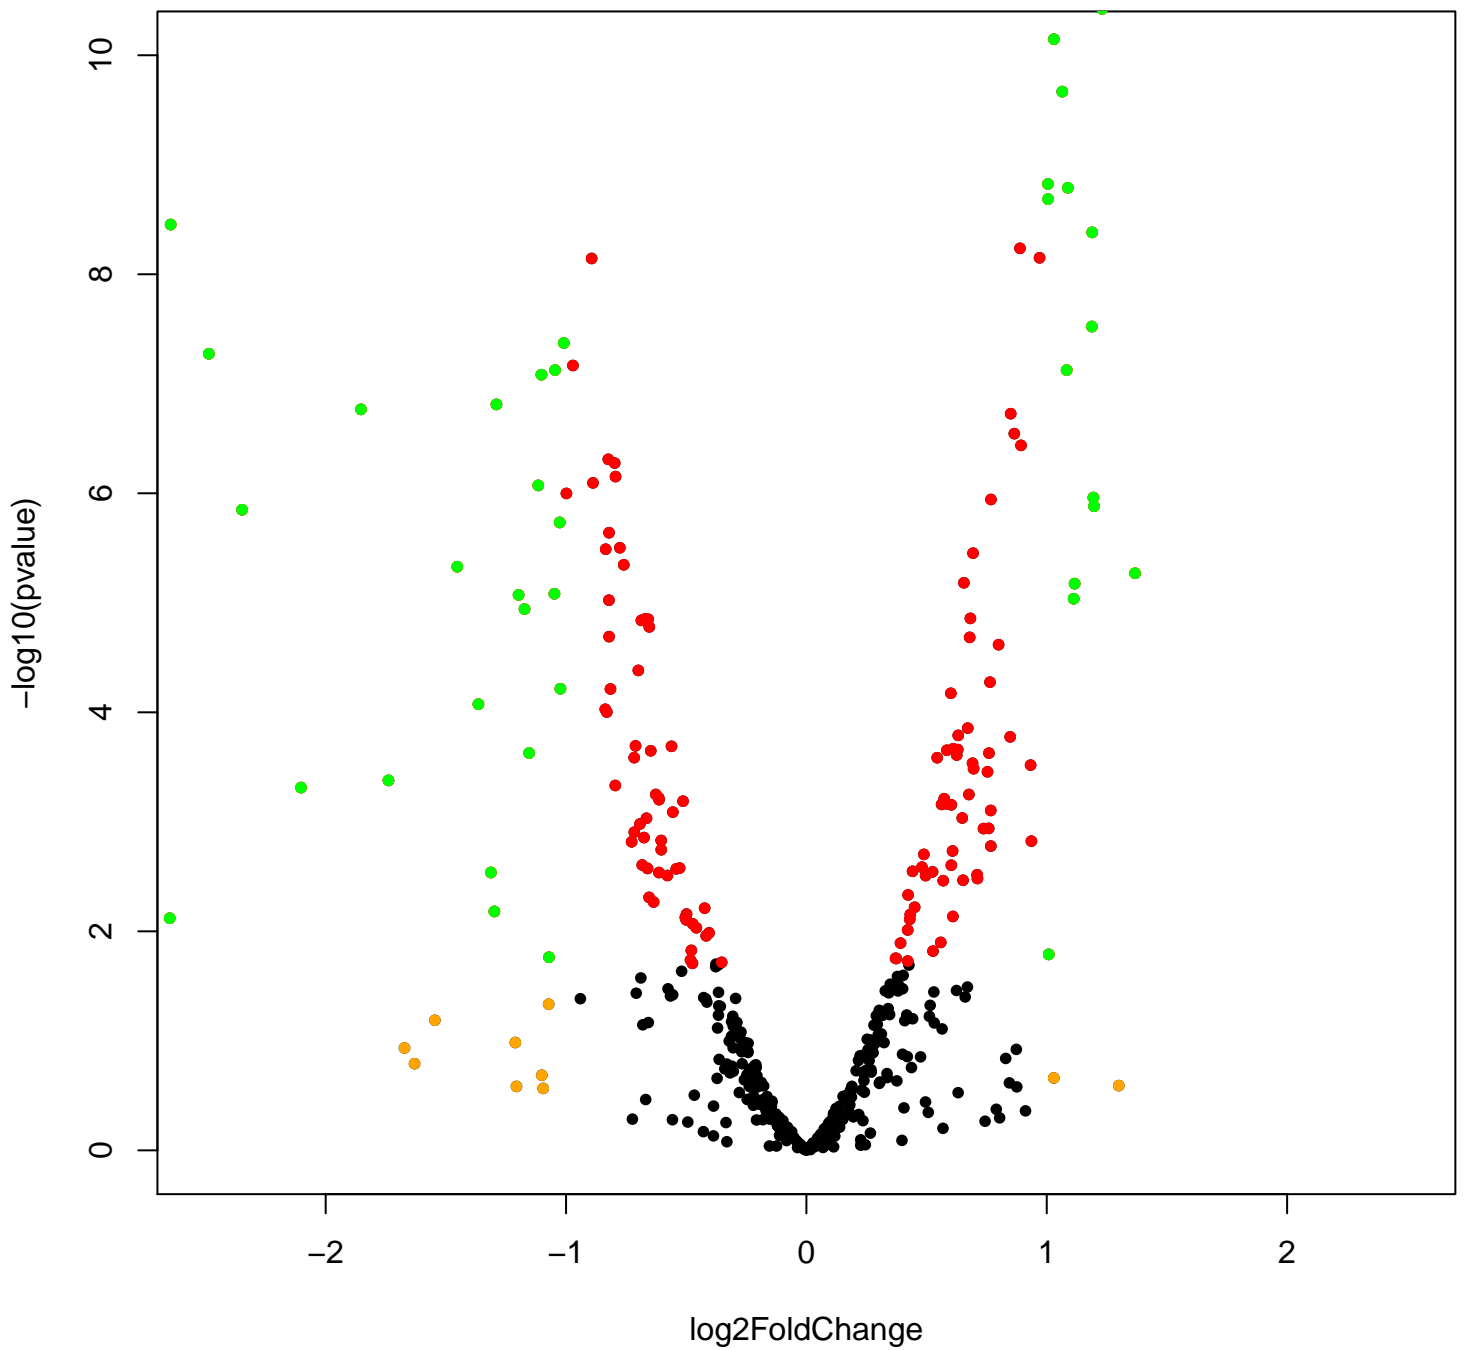

Supplement: Supplemental_Code_.zip [file Volcano_plot.pdf › TSSr-master/docs/reference/Volcano_plot.pdf]
